# Supplementary material
Source: HighWire-hosted journal article supplement (https://bmjopenrespres.bmj.com/content/8/1/e000759)

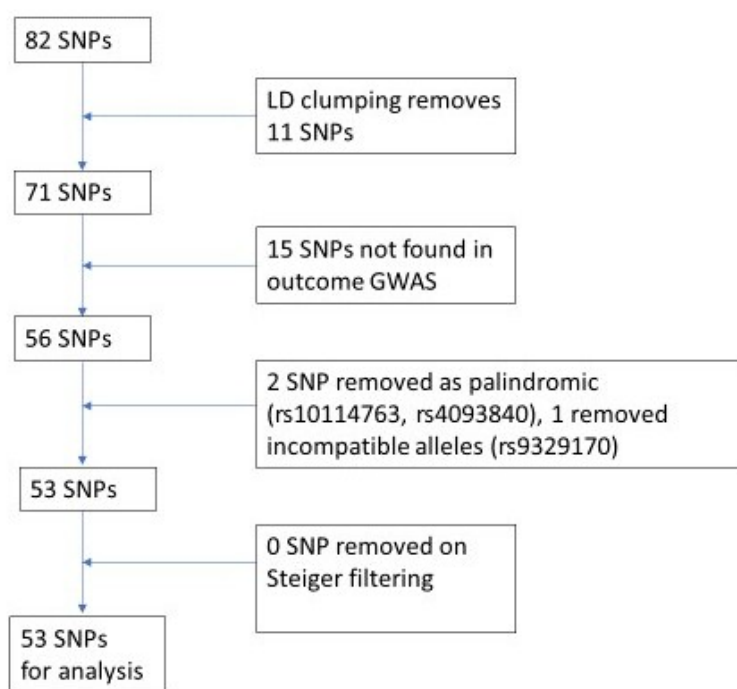

Supplement: inline-supplementary-material-13 [file inline-supplementary-material-13.pdf]
